# Supplementary material for: Iron, folic acid, and multiple micronutrient supplementation strategies during pregnancy and adverse birth outcomes in Botswana
Source: PubMed Central journal article supplement — Lancet Glob Health. Author manuscript; Available in PMC 2022 Jul 25. (PMC9309424; doi:10.1016/s2214-109x(22)00126-7), 2022-06
Supplement: NIHMS1806846-supplement-1.pdf [file NIHMS1806846-supplement-1.pdf]

# THE LANCET

## Global Health

### Supplementary appendix

This appendix formed part of the original submission and has been peer reviewed. We post it as supplied by the authors.

Supplement to: Caniglia EC, Zash R, Swanson SA, et al. Iron, folic acid, and multiple micronutrient supplementation strategies during pregnancy and adverse birth outcomes in Botswana. *Lancet Glob Health* 2022; **10**: e850–61.

Appendix Table 1. Baseline characteristics measured at the first antenatal visit by supplementation strategy in the weighted pseudo-population, The Tsepamo Study

|                                                                | Folic acid supplementation only<br>(n=1,140) | Iron supplementation only<br>(n=36,428) | Iron and Folic acid supplementation<br>(n=23,085) | Multiple Micronutrient supplementation<br>(n=32,005) |
|----------------------------------------------------------------|----------------------------------------------|-----------------------------------------|---------------------------------------------------|------------------------------------------------------|
| <b>Trimester of first ANC</b>                                  |                                              |                                         |                                                   |                                                      |
| First (<12 weeks)                                              | 25.34%                                       | 26.22%                                  | 26.46%                                            | 26.30%                                               |
| Second (12-24 weeks)                                           | 74.66%                                       | 73.78%                                  | 73.54%                                            | 73.70%                                               |
| <b>HIV</b>                                                     |                                              |                                         |                                                   |                                                      |
| Women with HIV                                                 | 20.06%                                       | 22.79%                                  | 22.43%                                            | 22.67%                                               |
| Women without HIV                                              | 79.94%                                       | 77.21%                                  | 77.57%                                            | 77.33%                                               |
| <b>Hemoglobin within 7 days of first ANC (g/dl)</b>            |                                              |                                         |                                                   |                                                      |
| <11                                                            | 23.59%                                       | 23.00%                                  | 22.30%                                            | 22.64%                                               |
| ≥11                                                            | 76.41%                                       | 77.00%                                  | 77.70%                                            | 77.36%                                               |
| <b>Weight at first ANC</b>                                     |                                              |                                         |                                                   |                                                      |
| <50 kg                                                         | 16.58%                                       | 14.85%                                  | 14.57%                                            | 14.73%                                               |
| 50-80kg                                                        | 69.24%                                       | 69.34%                                  | 69.42%                                            | 69.13%                                               |
| ≥80kg                                                          | 14.19%                                       | 15.81%                                  | 16.02%                                            | 16.14%                                               |
| <b>Health district of first ANC</b>                            |                                              |                                         |                                                   |                                                      |
| Rural – Northwest (Maun, Okavango, Chobe)                      | 7.30%                                        | 8.84%                                   | 8.75%                                             | 9.98%                                                |
| Rural – South (Ghanzi, Kgalagadi, Kweneng, Southern, Goodhope) | 15.65%                                       | 15.53%                                  | 14.40%                                            | 14.78%                                               |
| Urban – Gaborone                                               | 20.54%                                       | 23.82%                                  | 25.67%                                            | 25.74%                                               |
| Urban - Francistown                                            | 13.35%                                       | 14.27%                                  | 13.80%                                            | 14.24%                                               |
| Rural - East                                                   | 43.17%                                       | 37.53%                                  | 37.38%                                            | 35.27%                                               |
| <b>Age</b>                                                     |                                              |                                         |                                                   |                                                      |
| <20 years                                                      | 11.33%                                       | 11.36%                                  | 10.98%                                            | 10.94%                                               |
| 20-35 years                                                    | 73.36%                                       | 72.71%                                  | 72.96%                                            | 73.28%                                               |
| >=35 years                                                     | 15.30%                                       | 15.93%                                  | 16.06%                                            | 15.78%                                               |
| <b>Parity</b>                                                  |                                              |                                         |                                                   |                                                      |
| 1 or more children                                             | 58.25%                                       | 58.61%                                  | 58.41%                                            | 58.46%                                               |
| 0 children                                                     | 41.75%                                       | 41.31%                                  | 41.53%                                            | 41.48%                                               |
| Missing                                                        | 0.00%                                        | 0.08%                                   | 0.07%                                             | 0.06%                                                |
| <b>Occupation</b>                                              |                                              |                                         |                                                   |                                                      |
| Salaried                                                       | 41.38%                                       | 37.73%                                  | 38.31%                                            | 38.75%                                               |
| Other or missing                                               | 58.62%                                       | 62.27%                                  | 61.69%                                            | 61.25%                                               |
| <b>Education</b>                                               |                                              |                                         |                                                   |                                                      |
| Secondary or higher                                            | 95.12%                                       | 93.50%                                  | 93.66%                                            | 93.53%                                               |
| None or primary or missing                                     | 4.88%                                        | 6.50%                                   | 6.34%                                             | 6.47%                                                |
| <b>Calendar year of first ANC</b>                              |                                              |                                         |                                                   |                                                      |
| 2013-2016                                                      | 40.13%                                       | 39.83%                                  | 39.75%                                            | 41.22%                                               |
| 2017-2018                                                      | 32.55%                                       | 31.71%                                  | 32.05%                                            | 31.05%                                               |
| 2019-2020                                                      | 27.32%                                       | 28.46%                                  | 28.20%                                            | 27.73%                                               |
| <b>Season</b>                                                  |                                              |                                         |                                                   |                                                      |
| Rainy (November-March)                                         | 40.75%                                       | 41.89%                                  | 42.59%                                            | 42.43%                                               |
| Dry (April-October)                                            | 59.25%                                       | 58.11%                                  | 57.41%                                            | 57.68%                                               |
| <b>Smoking during pregnancy</b>                                |                                              |                                         |                                                   |                                                      |
| No                                                             | 94.45%                                       | 93.55%                                  | 93.49%                                            | 93.62%                                               |
| Yes                                                            | 1.01%                                        | 1.47%                                   | 1.50%                                             | 1.46%                                                |
| Missing                                                        | 4.54%                                        | 4.97%                                   | 5.01%                                             | 4.93%                                                |
| <b>Alcohol during pregnancy</b>                                |                                              |                                         |                                                   |                                                      |
| No                                                             | 87.05%                                       | 85.36%                                  | 85.08%                                            | 85.28%                                               |
| Yes                                                            | 8.43%                                        | 9.70%                                   | 9.94%                                             | 9.81%                                                |
| Missing                                                        | 4.52%                                        | 4.94%                                   | 4.98%                                             | 4.91%                                                |

Appendix Table 2. Unadjusted risks for each adverse birth outcome by supplementation strategy, The Tsepamo Study

| Outcome                               |         | No supplementation<br>(n=4,185) | Folic acid supplementation only<br>(n=1,133) | Iron supplementation only<br>(n=36,334) | Iron and Folic acid supplementation<br>(n=23,101) | Multiple Micronutrient supplementation<br>(n=31,588) |
|---------------------------------------|---------|---------------------------------|----------------------------------------------|-----------------------------------------|---------------------------------------------------|------------------------------------------------------|
| <b>Stillbirth</b>                     | Risk    | 4.21%                           | 2.74%                                        | 2.30%                                   | 1.80%                                             | 1.71%                                                |
|                                       | N/Total | 176/4,184                       | 31/1,133                                     | 835/36,332                              | 416/23,101                                        | 541/31,584                                           |
| <b>Preterm delivery</b>               | Risk    | 22.32%                          | 16.95%                                       | 14.75%                                  | 12.61%                                            | 11.60%                                               |
|                                       | N/Total | 934/4,185                       | 192/1,133                                    | 5,359/36,334                            | 2,913/23,101                                      | 3,663/31,588                                         |
| <b>Very preterm delivery</b>          | Risk    | 8.24%                           | 4.06%                                        | 3.20%                                   | 2.39%                                             | 1.98%                                                |
|                                       | N/Total | 345/4,185                       | 46/1,133                                     | 1,163/36,334                            | 551/23,101                                        | 626/31,588                                           |
| <b>SGA</b>                            | Risk    | 15.52%                          | 13.49%                                       | 15.22%                                  | 15.42%                                            | 16.22%                                               |
|                                       | N/Total | 643/4,142                       | 152/1,127                                    | 5,487/36,063                            | 3,536/22,933                                      | 5,082/31,330                                         |
| <b>Very SGA</b>                       | Risk    | 6.33%                           | 4.53%                                        | 5.70%                                   | 5.53%                                             | 6.03%                                                |
|                                       | N/Total | 262/4,142                       | 51/1,127                                     | 2,054/36,063                            | 1,269/22,933                                      | 1,888/31,330                                         |
| <b>Neonatal death</b>                 | Risk    | 2.41%                           | 1.00%                                        | 1.18%                                   | 0.94%                                             | 0.86%                                                |
|                                       | N/Total | 96/3,988                        | 11/1,096                                     | 418/35,405                              | 213/22,624                                        | 268/30,988                                           |
| <b>Stillbirth/<br/>neonatal death</b> | Risk    | 6.53%                           | 3.73%                                        | 3.46%                                   | 2.73%                                             | 2.57%                                                |
|                                       | N/Total | 272/4,164                       | 42/1,127                                     | 1,253/36,240                            | 629/23,040                                        | 809/31,529                                           |
| <b>Low birthweight</b>                | Risk    | 18.11%                          | 14.30%                                       | 12.46%                                  | 11.34%                                            | 10.70%                                               |
|                                       | N/Total | 757/4,181                       | 162/1,133                                    | 4,522/36,305                            | 2,617/23,076                                      | 3,379/31,573                                         |
| <b>Very low birthweight</b>           | Risk    | 10.26%                          | 6.35%                                        | 5.11%                                   | 4.26%                                             | 3.81%                                                |
|                                       | N/Total | 429/4,181                       | 72/1,133                                     | 1,856/36,305                            | 983/23,076                                        | 1,203/31,573                                         |
| <b>3rd trimester anemia</b>           | Risk    | 37.03%                          | 49.08%                                       | 27.66%                                  | 37.71%                                            | 29.47%                                               |
|                                       | N/Total | 761/2,055                       | 321/654                                      | 5,437/19,656                            | 4,835/12,823                                      | 5,054/17,150                                         |
| <b>C-section</b>                      | Risk    | 22.69%                          | 23.59%                                       | 23.27%                                  | 23.96%                                            | 20.82%                                               |
|                                       | N/Total | 948/4,178                       | 267/1,132                                    | 8,446/36,296                            | 5,530/23,083                                      | 6,571/31,560                                         |
| <b>Short length-for-age</b>           | Risk    | 10.35%                          | 8.20%                                        | 10.10%                                  | 9.46%                                             | 10.31%                                               |
|                                       | N/Total | 420/4,058                       | 91/1,110                                     | 3,588/35,508                            | 2,136/22,578                                      | 3,187/30,919                                         |

Appendix Table 3. Adjusted risk ratios for each adverse birth outcome by supplementation strategy, The Tsepamo Study

| Outcome                   | Folic acid supplementation only (n=1,133) | Iron supplementation only (n=36,334) | Iron and Folic acid supplementation (n=23,101) | Multiple Micronutrient supplementation (n=31,588) |
|---------------------------|-------------------------------------------|--------------------------------------|------------------------------------------------|---------------------------------------------------|
| Stillbirth                | 1.95 (0.94, 4.04)                         | 1.31 (1.16, 1.49)                    | 1.00 (reference)                               | 0.97 (0.84, 1.11)                                 |
| Preterm delivery          | 1.50 (1.18, 1.90)                         | 1.20 (1.14, 1.25)                    | 1.00 (reference)                               | 0.92 (0.88, 0.97)                                 |
| Very preterm delivery     | 1.47 (0.96, 2.26)                         | 1.40 (1.26, 1.55)                    | 1.00 (reference)                               | 0.79 (0.70, 0.90)                                 |
| SGA                       | 0.96 (0.73, 1.26)                         | 1.00 (0.96, 1.04)                    | 1.00 (reference)                               | 1.03 (0.99, 1.08)                                 |
| Very SGA                  | 1.04 (0.59, 1.83)                         | 1.04 (0.96, 1.11)                    | 1.00 (reference)                               | 1.07 (0.99, 1.16)                                 |
| Neonatal death            | 1.79 (0.71, 4.47)                         | 1.23 (1.03, 1.47)                    | 1.00 (reference)                               | 0.90 (0.74, 1.11)                                 |
| Stillbirth/neonatal death | 1.89 (1.07, 3.33)                         | 1.28 (1.16, 1.42)                    | 1.00 (reference)                               | 0.94 (0.84, 1.06)                                 |
| Low birth weight          | 1.49 (1.15, 1.93)                         | 1.11 (1.06, 1.16)                    | 1.00 (reference)                               | 0.91 (0.97, 0.97)                                 |
| Very low birth weight     | 1.74 (1.14, 2.66)                         | 1.24 (1.14, 1.34)                    | 1.00 (reference)                               | 0.87 (0.79, 0.95)                                 |
| 3rd trimester anemia      | 1.29 (1.11, 1.50)                         | 0.84 (0.81, 0.86)                    | 1.00 (reference)                               | 0.94 (0.91, 0.98)                                 |
| C-section                 | 1.14 (0.94, 1.38)                         | 0.97 (0.94, 1.00)                    | 1.00 (reference)                               | 0.89 (0.86, 0.92)                                 |
| Short length-for-age      | 0.97 (0.70, 1.35)                         | 1.06 (1.01, 1.12)                    | 1.00 (reference)                               | 1.05 (0.99, 1.11)                                 |

Risk ratios are adjusted for HIV status (positive, negative), first hemoglobin in pregnancy (restricted cubic splines with 5 knots at 9.5 g/dL, 10.2 g/dL, 11.9 g/dL, 13.4 g/dL, and 13.8 g/dL), first weight in pregnancy (restricted cubic splines with 5 knots at 47.9 kg, 53.5 kg, 62.0 kg, 73.5 kg, and 86.0 kg), region of first ANC, age (restricted cubic splines with 3 knots at 19, 27, and 36 years), year of booking (2014-2016, 2017-2018, 2019-2020), trimester of booking (1 [ $<12$  weeks gestation], 2 [12-24 weeks gestation]), employment (salaried, other or unknown), education (secondary or higher, primary or lower, missing), parity (first or missing, second or more), season (dry [April-October], rainy [November-March]), smoking (yes, no, missing), and alcohol (yes, no, missing) via inverse probability weighting. The models for each outcome are additionally adjusted for first hemoglobin in pregnancy (modeled linearly).

Appendix Table 4. Adjusted risk differences for adverse birth outcomes by supplementation strategy and key subgroups, The Tsepamo Study

| Subgroup             | Strategy (vs. IFAS) | Stillbirth         |               |            | Stillbirth/neonatal death |               |            | Preterm delivery   |               |            |       |       |       |
|----------------------|---------------------|--------------------|---------------|------------|---------------------------|---------------|------------|--------------------|---------------|------------|-------|-------|-------|
|                      |                     | Baseline Risk* (%) | Risk Diff (%) | 95% CI (%) | Baseline Risk* (%)        | Risk Diff (%) | 95% CI (%) | Baseline Risk* (%) | Risk Diff (%) | 95% CI (%) |       |       |       |
| Overall              | Folic acid          | 1.80               | 1.71          | -0.83      | 4.26                      | 2.73          | 2.43       | -0.48              | 5.34          | 12.61      | 5.75  | 1.38  | 10.13 |
|                      | Iron                |                    | 0.56          | 0.31       | 0.81                      |               | 0.77       | 0.47               | 1.08          |            | 2.39  | 1.78  | 3     |
|                      | MMS                 |                    | -0.06         | -0.32      | 0.19                      |               | -0.15      | -0.46              | 0.16          |            | -1.06 | -1.69 | -0.42 |
| Trimester 1          | Folic acid          | 2.04               | 5.88          | -3.2       | 14.96                     | 3.07          | 5.09       | -4.05              | 14.24         | 12.72      | 5.69  | -4.37 | 15.76 |
|                      | Iron                |                    | 0.7           | 0.18       | 1.23                      |               | 0.81       | 0.18               | 1.44          |            | 2.46  | 1.24  | 3.68  |
|                      | MMS                 |                    | -0.06         | -0.54      | 0.43                      |               | -0.07      | -0.68              | 0.54          |            | -1.19 | -2.37 | 0     |
| Trimester 2          | Folic acid          | 1.71               | 0.3           | -0.85      | 1.45                      | 2.61          | 1.59       | -0.76              | 3.94          | 12.57      | 5.77  | 1.05  | 10.5  |
|                      | Iron                |                    | 0.51          | 0.23       | 0.79                      |               | 0.76       | 0.41               | 1.11          |            | 2.36  | 1.66  | 3.06  |
|                      | MMS                 |                    | -0.07         | -0.36      | 0.23                      |               | -0.19      | -0.55              | 0.17          |            | -1    | -1.75 | -0.25 |
| HIV-negative         | Folic acid          | 1.72               | -0.04         | -1.14      | 1.05                      | 2.61          | 0.86       | -1.28              | 3             | 11.53      | 2.83  | -1.47 | 7.13  |
|                      | Iron                |                    | 0.37          | 0.1        | 0.65                      |               | 0.57       | 0.23               | 0.91          |            | 2.1   | 1.43  | 2.78  |
|                      | MMS                 |                    | -0.04         | -0.33      | 0.25                      |               | -0.13      | -0.48              | 0.22          |            | -0.84 | -1.54 | -0.13 |
| Women with HIV       | Folic acid          | 2.05               | 8.73          | -2.33      | 19.8                      | 3.12          | 8.71       | -2.28              | 19.71         | 16.04      | 18.01 | 6.28  | 29.74 |
|                      | Iron                |                    | 1.19          | 0.61       | 1.78                      |               | 1.45       | 0.75               | 2.15          |            | 3.4   | 2.01  | 4.78  |
|                      | MMS                 |                    | -0.15         | -0.69      | 0.4                       |               | -0.22      | -0.88              | 0.44          |            | -1.8  | -3.23 | -0.37 |
| <50kg                | Folic acid          | 1.62               | -1            | -1.95      | -0.05                     | 2.53          | 2.42       | -3.6               | 8.45          | 14.28      | 6.38  | -5.78 | 18.54 |
|                      | Iron                |                    | 0.3           | -0.33      | 0.92                      |               | 0.35       | -0.42              | 1.13          |            | 4.37  | 2.54  | 6.2   |
|                      | MMS                 |                    | 0.11          | -0.51      | 0.73                      |               | 0.17       | -0.59              | 0.93          |            | 0.02  | -1.75 | 1.8   |
| 50-80kg              | Folic acid          | 1.65               | 2.55          | -1.02      | 6.13                      | 2.58          | 2.65       | -1.12              | 6.42          | 12.67      | 6.53  | 1.06  | 12    |
|                      | Iron                |                    | 0.79          | 0.5        | 1.09                      |               | 0.98       | 0.62               | 1.34          |            | 2.3   | 1.58  | 3.02  |
|                      | MMS                 |                    | 0.03          | -0.26      | 0.33                      |               | -0.12      | -0.48              | 0.24          |            | -1.12 | -1.88 | -0.37 |
| >80kg                | Folic acid          | 2.62               | 0.92          | -2.7       | 4.54                      | 3.58          | 0.88       | -2.98              | 4.74          | 10.90      | 1     | -4.81 | 6.82  |
|                      | Iron                |                    | -0.13         | -0.81      | 0.56                      |               | 0.31       | -0.49              | 1.12          |            | 0.95  | -0.41 | 2.3   |
|                      | MMS                 |                    | -0.58         | -1.34      | 0.18                      |               | -0.52      | -1.42              | 0.38          |            | -1.72 | -3.24 | -0.19 |
| Hb <11 g/dl          | Folic acid          | 1.95               | 0.03          | -2.41      | 2.48                      | 2.87          | 3.49       | -2.32              | 9.3           | 14.68      | 10.75 | 0.74  | 20.76 |
|                      | Iron                |                    | 0.59          | 0.07       | 1.12                      |               | 0.62       | 0                  | 1.24          |            | 3.53  | 2.19  | 4.86  |
|                      | MMS                 |                    | -0.08         | -0.59      | 0.43                      |               | -0.09      | -0.71              | 0.54          |            | -0.31 | -1.7  | 1.08  |
| Hb ≥11 g/dl          | Folic acid          | 1.74               | 2.26          | -0.98      | 5.5                       | 2.67          | 2.03       | -1.25              | 5.32          | 11.77      | 4.47  | -0.37 | 9.31  |
|                      | Iron                |                    | 0.55          | 0.27       | 0.83                      |               | 0.82       | 0.47               | 1.17          |            | 2.11  | 1.43  | 2.79  |
|                      | MMS                 |                    | -0.05         | -0.35      | 0.24                      |               | -0.16      | -0.52              | 0.2           |            | -1.23 | -1.94 | -0.51 |
| Age<20               | Folic acid          | 1.01               | 0.02          | -1.77      | 1.8                       | 1.89          | 4.83       | -4.41              | 14.08         | 14.42      | 0.5   | -9.02 | 10.03 |
|                      | Iron                |                    | 0.37          | -0.14      | 0.89                      |               | 0.23       | -0.46              | 0.92          |            | 4.17  | 2.13  | 6.2   |
|                      | MMS                 |                    | 0.07          | -0.41      | 0.55                      |               | -0.07      | -0.74              | 0.61          |            | 0.62  | -1.48 | 2.71  |
| Age 20-35            | Folic acid          | 1.68               | 0.7           | -0.57      | 1.97                      | 2.58          | 0.34       | -1.04              | 1.71          | 11.80      | 4.08  | -0.5  | 8.66  |
|                      | Iron                |                    | 0.5           | 0.22       | 0.79                      |               | 0.71       | 0.36               | 1.06          |            | 2.3   | 1.61  | 2.99  |
|                      | MMS                 |                    | 0.06          | -0.24      | 0.36                      |               | -0.04      | -0.4               | 0.32          |            | -0.9  | -1.62 | -0.17 |
| Age ≥35              | Folic acid          | 2.85               | 7.91          | -6.42      | 22.23                     | 3.95          | 10.4       | -4.33              | 25.14         | 15.11      | 17.31 | 2.55  | 32.07 |
|                      | Iron                |                    | 1.06          | 0.25       | 1.88                      |               | 1.53       | 0.58               | 2.48          |            | 1.5   | -0.11 | 3.11  |
|                      | MMS                 |                    | -0.67         | -1.42      | 0.08                      |               | -0.66      | -1.58              | 0.26          |            | -2.79 | -4.44 | -1.15 |
| Urban                | Folic acid          | 2.40               | 2.91          | -2.77      | 8.6                       | 3.61          | 5.07       | -1.42              | 11.57         | 14.81      | 11.45 | 3.73  | 19.17 |
|                      | Iron                |                    | 0.67          | 0.25       | 1.09                      |               | 1.08       | 0.57               | 1.6           |            | 2.72  | 1.77  | 3.67  |
|                      | MMS                 |                    | -0.19         | -0.64      | 0.27                      |               | -0.1       | -0.66              | 0.45          |            | -0.78 | -1.84 | 0.29  |
| Rural                | Folic acid          | 1.30               | 0.93          | -0.45      | 2.31                      | 2.00          | 0.69       | -0.81              | 2.18          | 10.77      | 2.11  | -2.64 | 6.85  |
|                      | Iron                |                    | 0.52          | 0.22       | 0.82                      |               | 0.59       | 0.23               | 0.95          |            | 2.27  | 1.49  | 3.06  |
|                      | MMS                 |                    | 0.12          | -0.16      | 0.41                      |               | -0.05      | -0.39              | 0.3           |            | -0.94 | -1.71 | -0.17 |
| First birth          | Folic acid          | 1.55               | 0.05          | -1.04      | 1.14                      | 2.51          | 0.89       | -1.93              | 3.71          | 11.68      | 0.96  | -4.28 | 6.21  |
|                      | Iron                |                    | 0.46          | 0.1        | 0.81                      |               | 0.56       | 0.12               | 1.01          |            | 2.86  | 1.93  | 3.79  |
|                      | MMS                 |                    | 0.1           | -0.27      | 0.46                      |               | -0.01      | -0.48              | 0.45          |            | -0.61 | -1.56 | 0.34  |
| Second or more birth | Folic acid          | 1.97               | 2.91          | -1.33      | 7.15                      | 2.88          | 3.46       | -1                 | 7.92          | 13.26      | 9.17  | 2.84  | 15.51 |
|                      | Iron                |                    | 0.65          | 0.3        | 0.99                      |               | 0.94       | 0.52               | 1.35          |            | 2.07  | 1.27  | 2.87  |
|                      | MMS                 |                    | -0.16         | -0.51      | 0.19                      |               | -0.24      | -0.65              | 0.18          |            | -1.35 | -2.20 | -0.50 |
| 2ndary education     | Folic acid          | 1.82               | 1.69          | -0.96      | 4.34                      | 2.76          | 2.37       | -0.66              | 5.41          | 12.45      | 5.70  | 1.14  | 10.25 |
|                      | Iron                |                    | 0.50          | 0.24       | 0.76                      |               | 0.67       | 0.36               | 0.98          |            | 2.32  | 1.70  | 2.94  |
|                      | MMS                 |                    | -0.07         | -0.33      | 0.20                      |               | -0.17      | -0.49              | 0.16          |            | -0.96 | -1.61 | -0.30 |
| Primary education    | Folic acid          | 1.42               | 2.10          | -4.72      | 8.93                      | 2.21          | 3.34       | -4.38              | 11.05         | 15.45      | 7.86  | -5.43 | 21.16 |
|                      | Iron                |                    | 1.42          | 0.40       | 2.45                      |               | 2.28       | 0.95               | 3.60          |            | 3.31  | 0.49  | 6.12  |
|                      | MMS                 |                    | 0.05          | -0.86      | 0.96                      |               | 0.05       | -1.04              | 1.14          |            | -2.53 | -5.27 | 0.20  |
| Salaried             | Folic acid          | 1.97               | 3.42          | -2.48      | 9.32                      | 3.01          | 3.67       | -2.50              | 9.83          | 11.89      | 8.87  | 0.64  | 17.10 |
|                      | Iron                |                    | 0.62          | 0.20       | 1.04                      |               | 0.86       | 0.35               | 1.37          |            | 1.52  | 0.59  | 2.45  |

|               |            |      |       |       |      |      |       |       |      |       |       |       |       |
|---------------|------------|------|-------|-------|------|------|-------|-------|------|-------|-------|-------|-------|
| employment    | MMS        |      | -0.15 | -0.59 | 0.29 |      | -0.15 | -0.69 | 0.40 |       | -2.19 | -3.18 | -1.21 |
| Non-salaried  | Folic acid | 1.69 | 0.50  | -0.60 | 1.59 | 2.55 | 1.61  | -0.89 | 4.10 | 13.09 | 3.63  | -0.94 | 8.20  |
| employment    | Iron       |      | 0.51  | 0.20  | 0.82 |      | 0.71  | 0.33  | 1.09 |       | 2.92  | 2.12  | 3.72  |
|               | MMS        |      | -0.01 | -0.32 | 0.30 |      | -0.16 | -0.53 | 0.20 |       | -0.31 | -1.13 | 0.52  |
| HIV-, present | Folic acid | 1.82 | -0.38 | -1.5  | 0.73 | 2.77 | -0.04 | -2.06 | 1.98 | 11.50 | 1.85  | -2.94 | 6.65  |
| to care <20   | Iron       |      | 0.32  | 0.01  | 0.63 |      | 0.45  | 0.07  | 0.84 |       | 1.83  | 1.09  | 2.57  |
| weeks         | MMS        |      | -0.07 | -0.39 | 0.25 |      | -0.16 | -0.56 | 0.24 |       | -1.12 | -1.88 | -0.35 |

Appendix Table 4 continued. Adjusted risk differences for adverse birth outcomes by supplementation strategy and key subgroups, The Tsepamo Study

| Subgroup             | Strategy (vs. IFAS) | SGA                |               |            | Neonatal death     |               |            | Low birthweight    |               |            |       |        |       |
|----------------------|---------------------|--------------------|---------------|------------|--------------------|---------------|------------|--------------------|---------------|------------|-------|--------|-------|
|                      |                     | Baseline Risk* (%) | Risk Diff (%) | 95% CI (%) | Baseline Risk* (%) | Risk Diff (%) | 95% CI (%) | Baseline Risk* (%) | Risk Diff (%) | 95% CI (%) |       |        |       |
| Overall              | Folic acid          | 15.42              | -0.66         | -4.69      | 3.36               | 0.94          | 0.77       | -0.8               | 2.34          | 11.34      | 5.46  | 1.09   | 9.83  |
|                      | Iron                |                    | -0.05         | -0.69      | 0.59               |               | 0.22       | 0.04               | 0.4           |            | 1.24  | 0.66   | 1.82  |
|                      | MMS                 |                    | 0.53          | -0.17      | 1.24               |               | -0.09      | -0.27              | 0.09          |            | -0.99 | -1.59  | -0.38 |
| Trimester 1          | Folic acid          | 14.31              | 1.42          | -8.67      | 11.51              | 1.05          |            |                    |               | 11.81      | 8.54  | -2.38  | 19.47 |
|                      | Iron                |                    | 0.38          | -0.86      | 1.62               |               |            |                    |               |            | 1.3   | 0.14   | 2.47  |
|                      | MMS                 |                    | 0.26          | -0.99      | 1.52               |               |            |                    |               |            | -1.08 | -2.22  | 0.07  |
| Trimester 2          | Folic acid          | 15.82              | -1.35         | -5.5       | 2.81               | 0.90          | 1.26       | -0.77              | 3.29          | 11.17      | 4.4   | -0.04  | 8.84  |
|                      | Iron                |                    | -0.19         | -0.94      | 0.56               |               | 0.26       | 0.05               | 0.46          |            | 1.22  | 0.56   | 1.89  |
|                      | MMS                 |                    | 0.63          | -0.22      | 1.47               |               | -0.13      | -0.34              | 0.08          |            | -0.96 | -1.67  | -0.25 |
| HIV-negative         | Folic acid          | 13.94              | -3.45         | -6.89      | -0.01              | 0.89          | 0.92       | -0.98              | 2.81          | 9.83       | 3.35  | -0.94  | 7.65  |
|                      | Iron                |                    | 0.08          | -0.63      | 0.78               |               | 0.2        | 0                  | 0.4           |            | 1.15  | 0.52   | 1.78  |
|                      | MMS                 |                    | 0.82          | 0.04       | 1.6                |               | -0.09      | -0.3               | 0.11          |            | -0.76 | -1.41  | -0.11 |
| Women with HIV       | Folic acid          | 20.11              | 11.16         | -0.84      | 23.17              | 1.09          | 0.13       | -1.34              | 1.59          | 16.15      | 14.93 | 3.05   | 26.82 |
|                      | Iron                |                    | -0.55         | -2.02      | 0.92               |               | 0.28       | -0.13              | 0.69          |            | 1.53  | 0.16   | 2.91  |
|                      | MMS                 |                    | -0.51         | -2.12      | 1.1                |               | -0.08      | -0.46              | 0.3           |            | -1.81 | -3.26  | -0.37 |
| <50kg                | Folic acid          | 23.81              | -10.41        | -16.5      | -4.33              | 0.92          | 3.77       | -2.97              | 10.5          | 16.35      | 0.82  | -7.81  | 9.45  |
|                      | Iron                |                    | -1.22         | -3.28      | 0.84               |               | 0.06       | -0.4               | 0.53          |            | 2.34  | 0.45   | 4.22  |
|                      | MMS                 |                    | 0.92          | -1.2       | 3.04               |               | 0.06       | -0.39              | 0.51          |            | -1.16 | -2.99  | 0.68  |
| 50-80kg              | Folic acid          | 14.90              | 2.07          | -3.35      | 7.5                | 0.94          | 0.12       | -1.23              | 1.48          | 10.92      | 7.5   | 1.68   | 13.32 |
|                      | Iron                |                    | 0             | -0.75      | 0.75               |               | 0.2        | -0.01              | 0.42          |            | 1.04  | 0.37   | 1.71  |
|                      | MMS                 |                    | 0.56          | -0.27      | 1.4                |               | -0.15      | -0.37              | 0.06          |            | -0.8  | -1.52  | -0.09 |
| >80kg                | Folic acid          | 10.42              | -4.87         | -8.56      | -1.19              | 0.97          | -0.04      | -1.42              | 1.34          | 8.81       | 0.07  | -5.03  | 5.17  |
|                      | Iron                |                    | 0.65          | -0.66      | 1.95               |               | 0.44       | 0                  | 0.88          |            | 1.03  | -0.18  | 2.25  |
|                      | MMS                 |                    | -0.05         | -1.54      | 1.44               |               | 0.05       | -0.46              | 0.56          |            | -1.63 | -2.91  | -0.35 |
| Hb <11 g/dl          | Folic acid          | 15.75              | 1.15          | -6.12      | 8.42               | 0.94          | 3.6        | -2.01              | 9.22          | 12.60      | 12.54 | 2.52   | 22.56 |
|                      | Iron                |                    | -0.25         | -1.56      | 1.06               |               | 0.03       | -0.31              | 0.38          |            | 1.76  | 0.53   | 2.99  |
|                      | MMS                 |                    | -0.5          | -1.89      | 0.89               |               | -0.02      | -0.38              | 0.35          |            | -1.22 | -2.45  | 0.02  |
| Hb ≥11 g/dl          | Folic acid          | 15.28              | -1.26         | -6.03      | 3.52               | 0.94          | -0.23      | -0.79              | 0.33          | 10.83      | 3.37  | -1.34  | 8.08  |
|                      | Iron                |                    | -0.02         | -0.75      | 0.71               |               | 0.28       | 0.08               | 0.49          |            | 1.08  | 0.43   | 1.74  |
|                      | MMS                 |                    | 0.83          | 0.01       | 1.65               |               | -0.11      | -0.32              | 0.1           |            | -0.93 | -1.62  | -0.24 |
| Age<20               | Folic acid          | 17.23              | -5.89         | -          | 12.61              | 0.89          | 5.05       | -4.55              | 14.65         | 11.41      | 3.54  | -7.55  | 14.63 |
|                      | Iron                |                    | -2.23         | -4.3       | -0.16              |               | -0.13      | -0.59              | 0.33          |            | 1.3   | -0.55  | 3.14  |
|                      | MMS                 |                    | -1.15         | -3.37      | 1.06               |               | -0.13      | -0.61              | 0.35          |            | -1.01 | -2.84  | 0.83  |
| Age 20-35            | Folic acid          | 15.01              | -1.86         | -5.95      | 2.23               | 0.91          | -0.38      | -0.87              | 0.1           | 10.53      | 4.12  | -0.47  | 8.72  |
|                      | Iron                |                    | -0.08         | -0.82      | 0.65               |               | 0.22       | 0.01               | 0.43          |            | 1.28  | 0.63   | 1.94  |
|                      | MMS                 |                    | 0.69          | -0.13      | 1.51               |               | -0.09      | -0.3               | 0.11          |            | -0.72 | -1.4   | -0.03 |
| Age ≥35              | Folic acid          | 16.12              | 10.03         | -5.63      | 25.69              | 1.13          | 2.88       | -3.19              | 8.95          | 14.97      | 13.7  | -1.27  | 28.67 |
|                      | Iron                |                    | 1.61          | -0.02      | 3.24               |               | 0.5        | -0.02              | 1.03          |            | 1.01  | -0.57  | 2.59  |
|                      | MMS                 |                    | 0.97          | -0.81      | 2.76               |               | 0.01       | -0.55              | 0.56          |            | -2.17 | -3.82  | -0.52 |
| Urban                | Folic acid          | 15.00              | 1.82          | -5.33      | 8.98               | 1.23          | 2.28       | -1.4               | 5.96          | 13.97      | 9.78  | 1.89   | 17.66 |
|                      | Iron                |                    | 0.9           | -0.03      | 1.82               |               | 0.43       | 0.12               | 0.74          |            | 1.78  | 0.86   | 2.71  |
|                      | MMS                 |                    | 0.84          | -0.26      | 1.94               |               | 0.08       | -0.26              | 0.42          |            | -0.91 | -1.94  | 0.12  |
| Rural                | Folic acid          | 15.77              | -2.54         | -7.07      | 1.99               | 0.70          | -0.23      | -0.79              | 0.32          | 9.15       | 2.71  | -1.82  | 7.23  |
|                      | Iron                |                    | -0.81         | -1.69      | 0.07               |               | 0.09       | -0.13              | 0.3           |            | 0.99  | 0.27   | 1.72  |
|                      | MMS                 |                    | 0.25          | -0.68      | 1.18               |               | -0.17      | -0.36              | 0.03          |            | -0.7  | -1.42  | 0.02  |
| First birth          | Folic acid          | 17.86              | -3.84         | -8.44      | 0.75               | 0.97          | 0.84       | -1.83              | 3.51          | 11.41      | -0.21 | -4.9   | 4.48  |
|                      | Iron                |                    | -0.5          | -1.55      | 0.56               |               | 0.11       | -0.17              | 0.39          |            | 1.5   | 0.58   | 2.41  |
|                      | MMS                 |                    | 0.41          | -0.74      | 1.57               |               | -0.12      | -0.41              | 0.18          |            | -0.95 | -1.88  | -0.02 |
| Second or more birth | Folic acid          | 13.69              | 1.61          | -4.45      | 7.68               | 0.92          | 0.63       | -1.07              | 2.33          | 11.29      | 9.53  | 3.03   | 16.04 |
|                      | Iron                |                    | 0.26          | -0.53      | 1.06               |               | 0.3        | 0.07               | 0.54          |            | 1.07  | 0.33   | 1.82  |
|                      | MMS                 |                    | 0.60          | -0.28      | 1.49               |               | -0.08      | -0.30              | 0.15          |            | -0.99 | -1.79  | -0.20 |
| 2ndary education     | Folic acid          | 15.17              | -0.45         | -4.64      | 3.75               | 0.95          | 0.74       | -0.90              | 2.37          | 11.08      | 5.74  | 1.19   | 10.30 |
|                      | Iron                |                    | 0.05          | -0.60      | 0.71               |               | 0.18       | -0.01              | 0.36          |            | 1.39  | 0.81   | 1.98  |
|                      | MMS                 |                    | 0.63          | -0.09      | 1.36               |               | -0.10      | -0.29              | 0.10          |            | -0.85 | -1.47  | -0.24 |
| Primary education    | Folic acid          | 19.68              | -3.57         | -          | 14.34              | 0.80          | 1.38       | -2.76              | 5.53          | 15.77      | 1.55  | -10.28 | 13.39 |
|                      | Iron                |                    | -1.70         | -4.63      | 1.24               |               | 0.97       | 0.02               | 1.91          |            | -1.16 | -3.91  | 1.59  |
|                      | MMS                 |                    | -1.07         | -4.13      | 1.99               |               | 0.01       | -0.56              | 0.58          |            | -3.08 | -5.86  | -0.31 |
| Salaried             | Folic acid          |                    | 1.66          | -5.80      | 9.12               |               | 0.26       | -1.79              | 2.32          |            | 9.30  | 1.17   | 17.42 |

|                                 |            |       |       |       |      |      |       |       |      |       |       |       |       |
|---------------------------------|------------|-------|-------|-------|------|------|-------|-------|------|-------|-------|-------|-------|
| employment                      | Iron       | 13.95 | 1.09  | 0.11  | 2.07 | 1.05 | 0.26  | -0.05 | 0.56 | 10.97 | 1.55  | 0.65  | 2.45  |
|                                 | MMS        |       | 0.68  | -0.42 | 1.79 |      | 0.01  | -0.33 | 0.34 |       | -1.13 | -2.10 | -0.16 |
| Non-salaried employment         | Folic acid | 16.38 | -2.13 | -6.51 | 2.25 | 0.87 | 1.14  | -1.19 | 3.46 | 11.58 | 2.77  | -1.84 | 7.39  |
|                                 | Iron       |       | -0.76 | -1.60 | 0.08 |      | 0.21  | -0.01 | 0.43 |       | 1.05  | 0.30  | 1.80  |
|                                 | MMS        |       | 0.45  | -0.46 | 1.37 |      | -0.15 | -0.36 | 0.06 |       | -0.91 | -1.68 | -0.14 |
| HIV-, present to care <20 weeks | Folic acid | 13.73 | -3.84 | -7.71 | 0.03 | 0.96 | 0.36  | -1.4  | 2.11 | 9.90  | 2.44  | -2.33 | 7.21  |
|                                 | Iron       |       | 0.12  | -0.66 | 0.89 |      | 0.14  | -0.09 | 0.37 |       | 1.05  | 0.35  | 1.74  |
|                                 | MMS        |       | 1.07  | 0.22  | 1.92 |      | -0.09 | -0.33 | 0.15 |       | -0.74 | -1.46 | -0.02 |

\*Baseline risks are the unadjusted risks of each outcome among those who receive IFAS.

Risk differences are adjusted for HIV status (positive, negative), first hemoglobin in pregnancy (restricted cubic splines with 5 knots at 9.5 g/dL, 10.2 g/dL, 11.9 g/dL, 13.4 g/dL, and 13.8 g/dL), first weight in pregnancy (restricted cubic splines with 5 knots at 47.9 kg, 53.5 kg, 62.0 kg, 73.5 kg, and 86.0 kg), region of first ANC, age (restricted cubic splines with 3 knots at 19, 27, and 36 years), year of booking (2014-2016, 2017-2018, 2019-2020), trimester of booking (1 [<12 weeks gestation], 2 [12-24 weeks gestation]), employment (salaried, other or unknown), education (secondary or higher, primary or lower, missing), parity (first or missing, second or more), season (dry [April-October], rainy [November-March]), smoking (yes, no, missing), and alcohol (yes, no, missing) via inverse probability weighting. The models for each outcome are additionally adjusted for first hemoglobin in pregnancy (modeled linearly).



Appendix Figure 1. CONSORT diagram

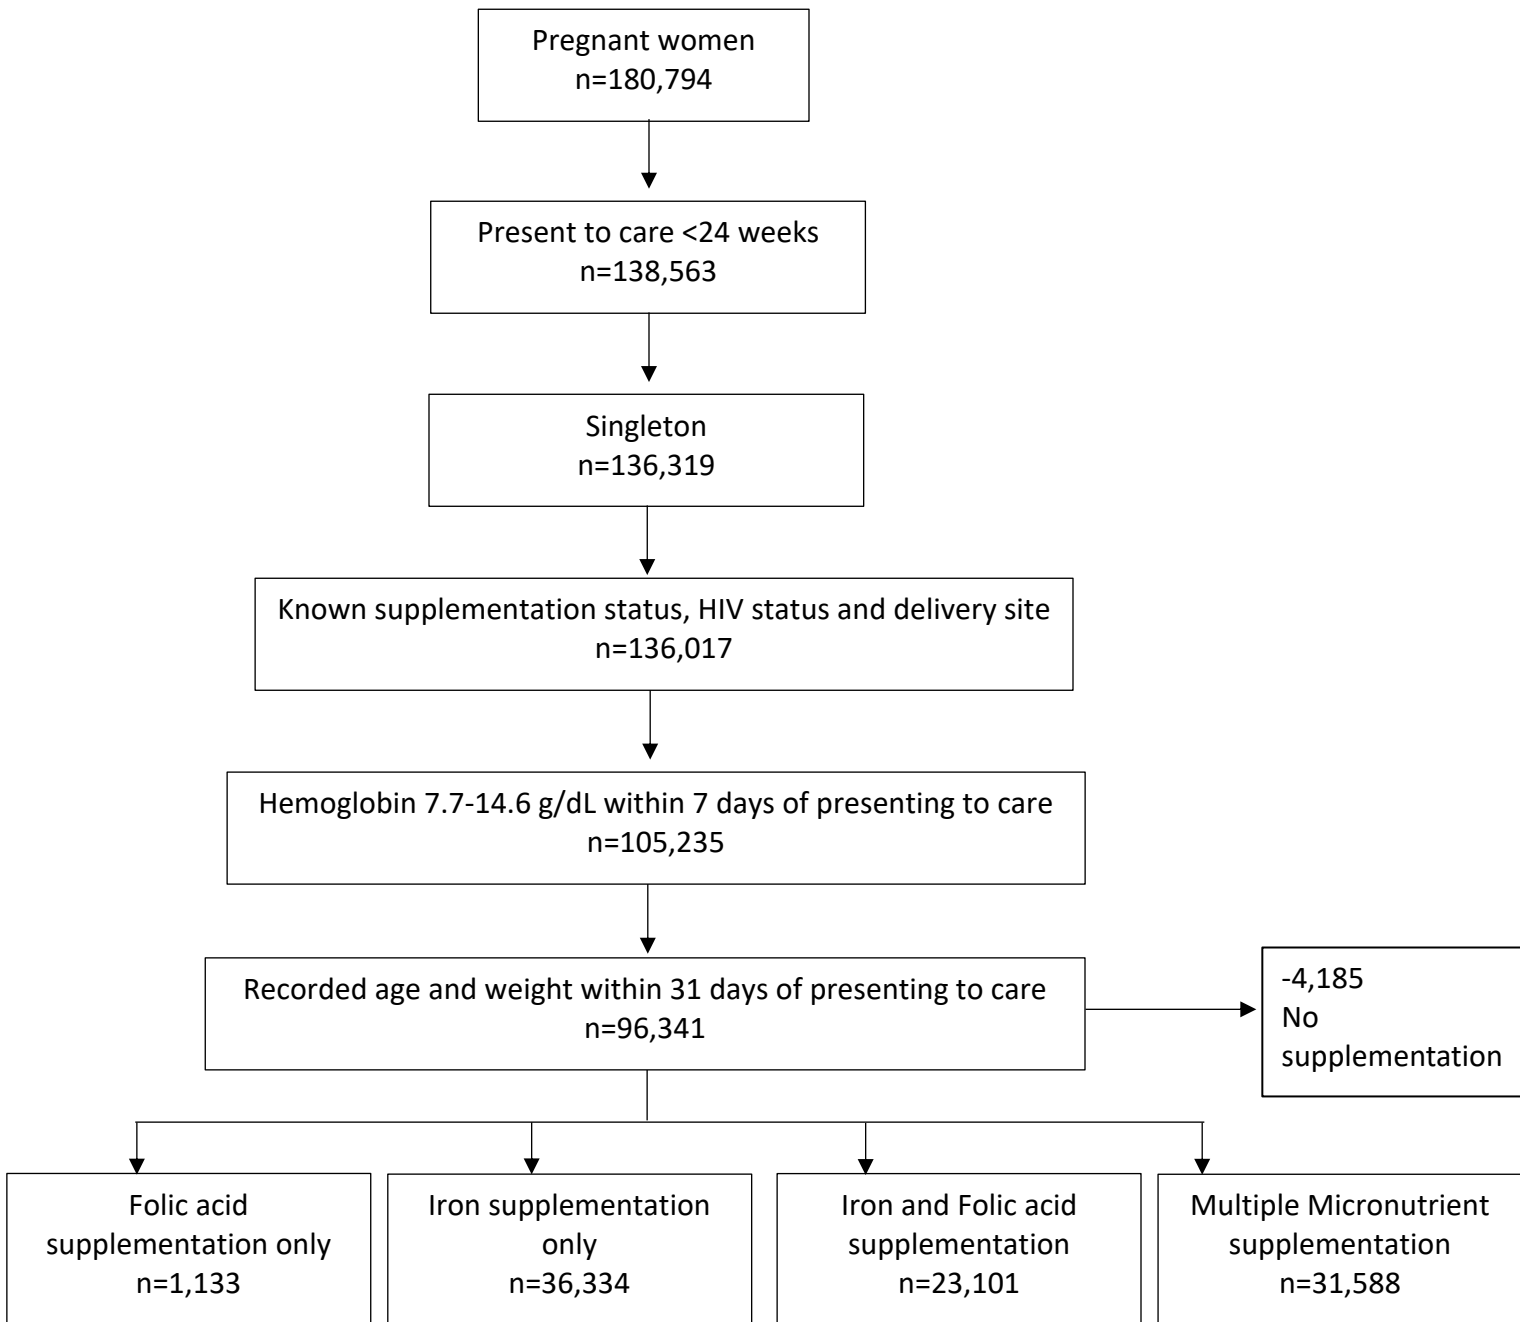

Appendix Figure 2. Adjusted risk differences for adverse birth outcomes by supplementation strategy and by health district region, The Tsepamo Study

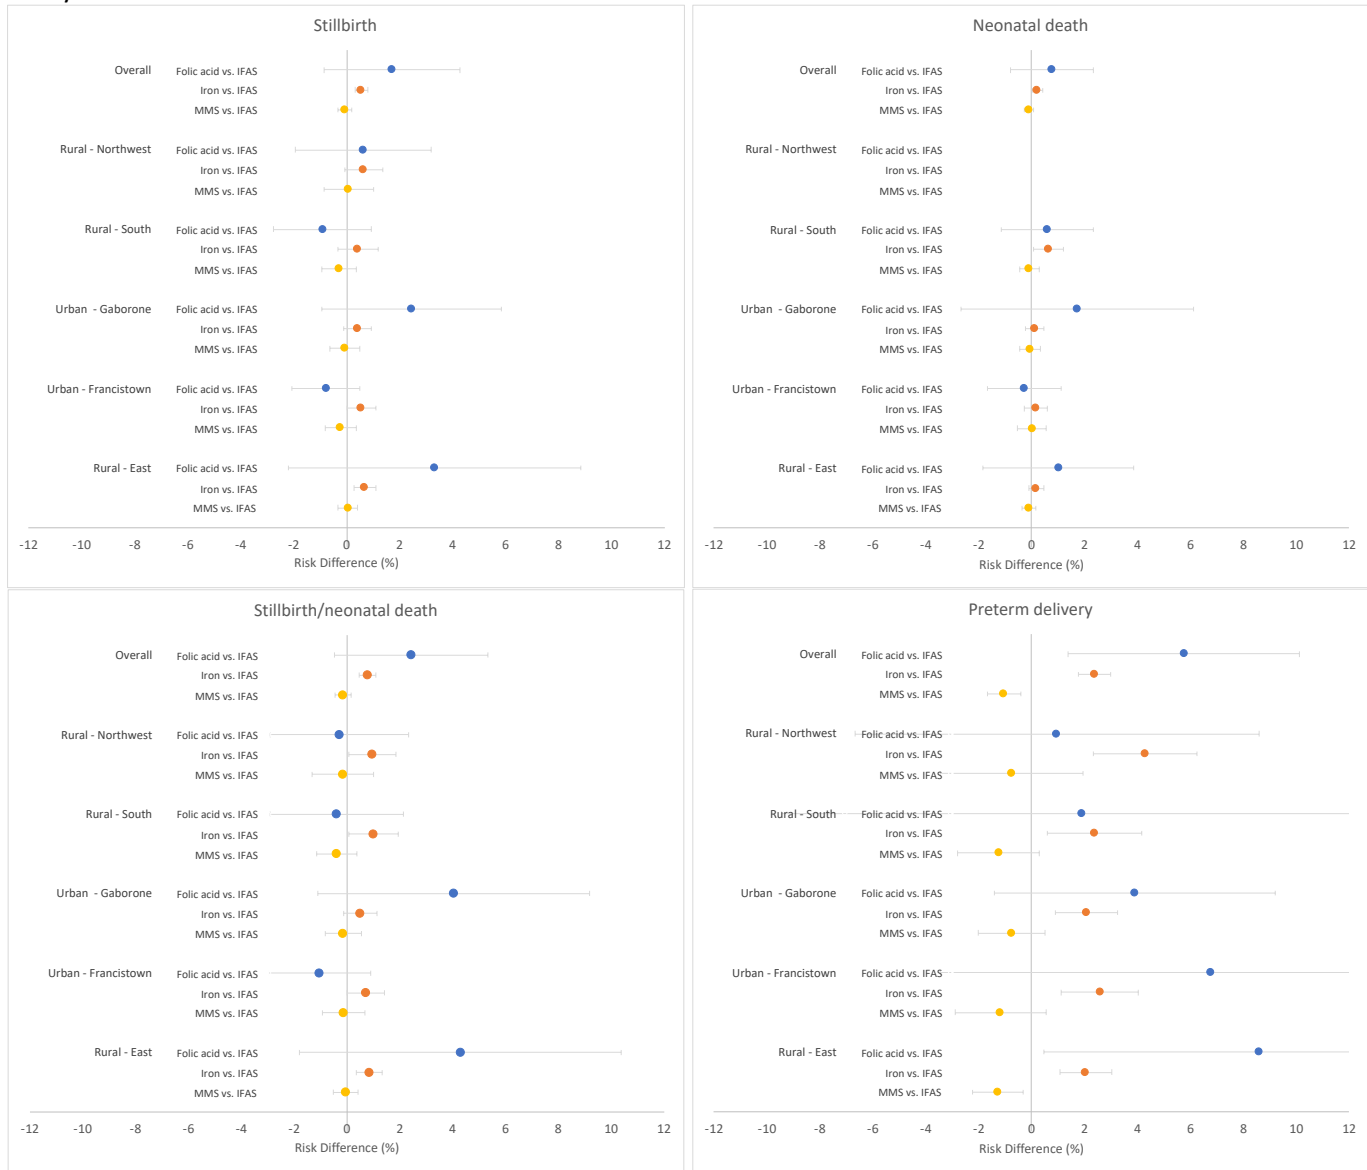

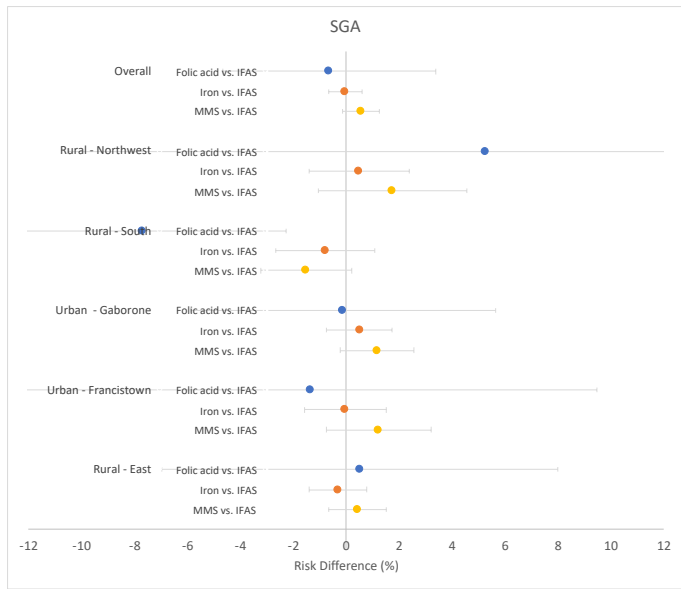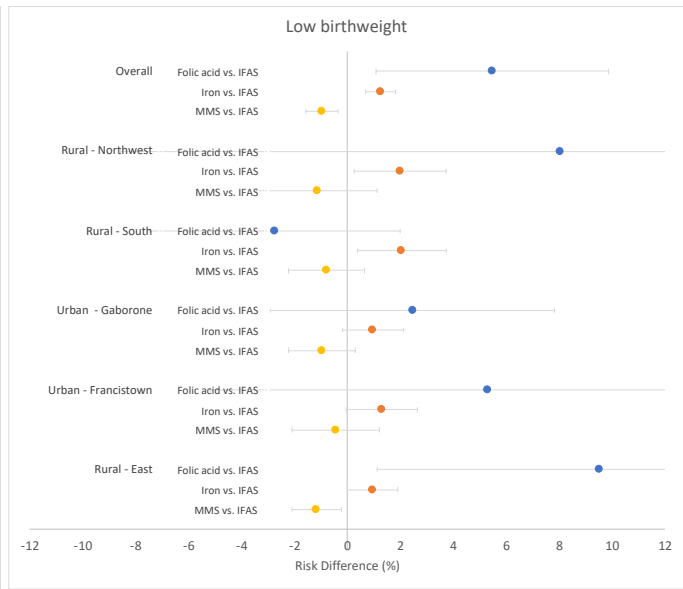

Additional Table 2. Adjusted mean differences and adjusted absolute means for **continuous gestational age at delivery and birthweight** by supplementation strategy, The Tsepamo Study

| Outcome                                    | Estimate           | Folic acid supplementation only<br>(n=1,133) | Iron supplementation only<br>(n=36,334) | Iron and Folic acid supplementation<br>(n=23,101) | Multiple Micronutrient supplementation<br>(n=31,588) |
|--------------------------------------------|--------------------|----------------------------------------------|-----------------------------------------|---------------------------------------------------|------------------------------------------------------|
| <b>Gestational age at delivery (weeks)</b> | Mean Diff (95% CI) | -0.45 (-0.74, -0.16)                         | -0.22 (-0.26, -0.17)                    | 0.0 (reference)                                   | 0.11 (0.07, 0.16)                                    |
|                                            | Mean               | 38.17                                        | 38.40                                   | 38.62                                             | 38.73                                                |
| <b>Birthweight (grams)</b>                 | Mean Diff (95% CI) | -82.38 (-159.26, -5.49)                      | -35.88 (-46.23, -25.53)                 | 0.0 (reference)                                   | 1.22 (-9.66, 12.10)                                  |
|                                            | Mean               | 2997.99                                      | 3044.48                                 | 3080.36                                           | 3081.58                                              |

Mean differences are adjusted for HIV status (positive, negative), first hemoglobin in pregnancy (restricted cubic splines with 5 knots at 9.5 g/dL, 10.2 g/dL, 11.9 g/dL, 13.4 g/dL, and 13.8 g/dL), first weight in pregnancy (restricted cubic splines with 5 knots at 47.9 kg, 53.5 kg, 62.0 kg, 73.5 kg, and 86.0 kg), region of first ANC, age (restricted cubic splines with 3 knots at 19, 27, and 36 years), year of booking (2014-2016, 2017-2018, 2019-2020), trimester of booking (1 [<12 weeks gestation], 2 [12-24 weeks gestation]), employment (salaried, other or unknown), education (secondary or higher, primary or lower, missing), parity (first or missing, second or more), season (dry [April-October], rainy [November-March]), smoking (yes, no, missing), and alcohol (yes, no, missing) via inverse probability weighting. The models for each outcome are additionally adjusted for first hemoglobin in pregnancy (modeled linearly).

We used linear regression models to estimate mean differences.
